# Supplementary material
Source: Springer Nature journal article supplement (https://www.springermedizin.de/resource/supplementary/12916_2010_427_MOESM3_ESM.pdf/9599936)

**% OF PATIENTS**

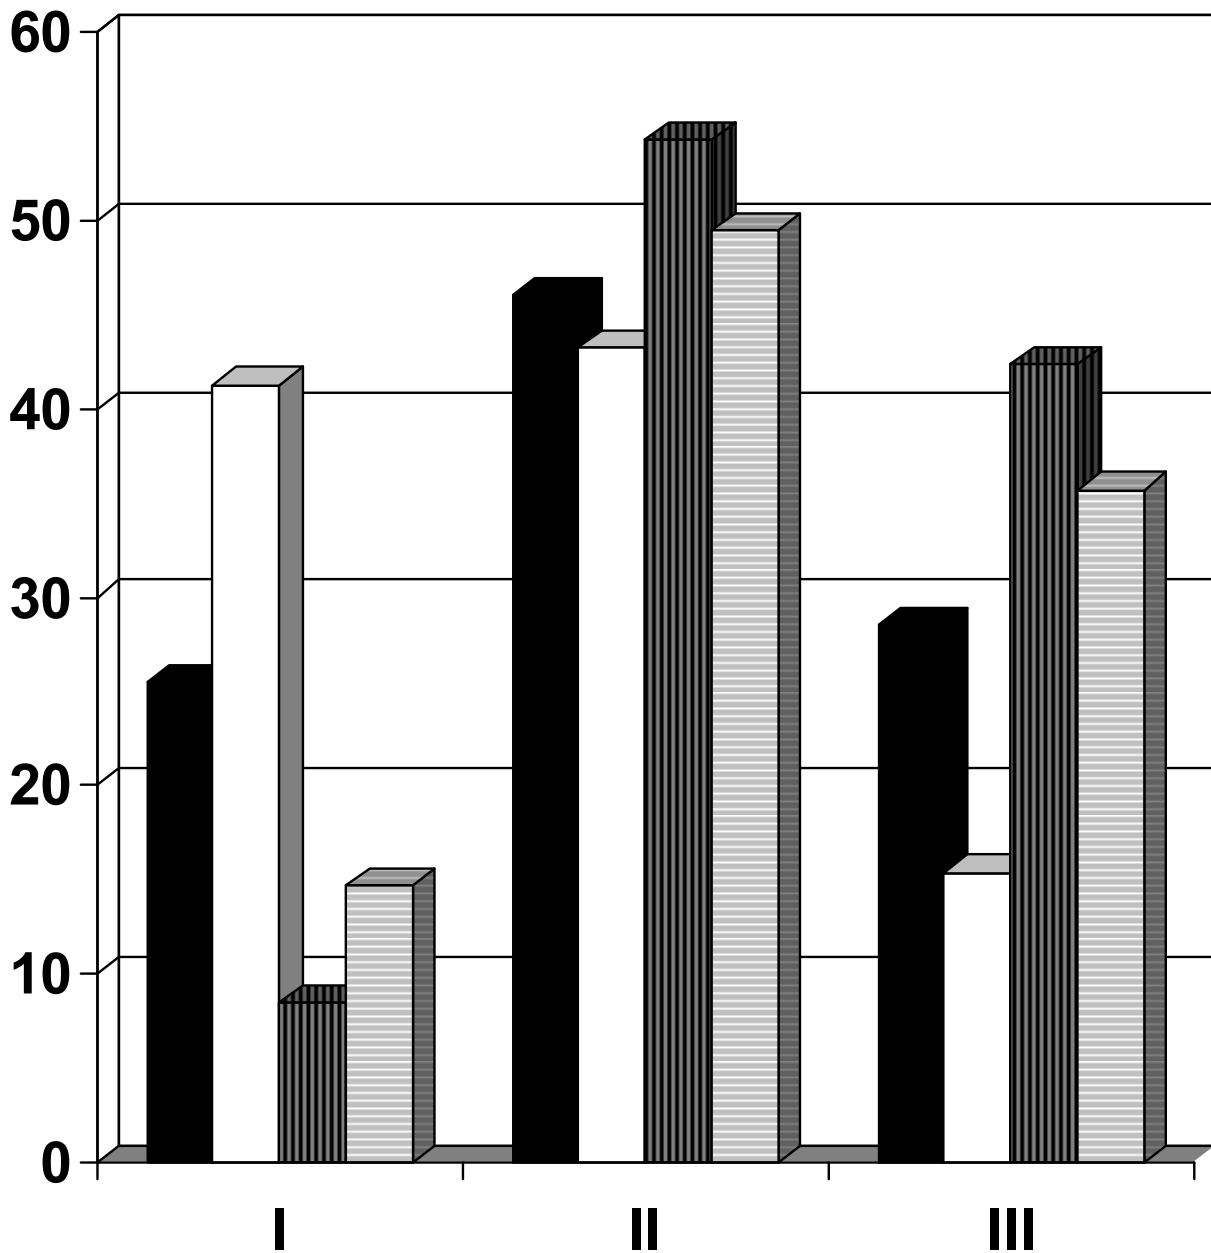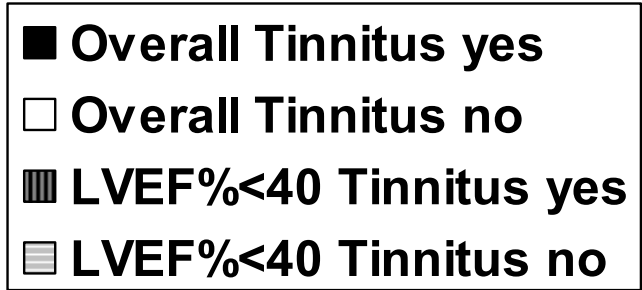

Supplement: MOESM3 [file 9599936]
